# Supplementary material
Source: HighWire-hosted journal article supplement (https://svn.smart01.highwire.org/content/svn-2024-003779)
Supplement: inline-supplementary-material-1 [file inline-supplementary-material-1.pdf]

Supplementary material

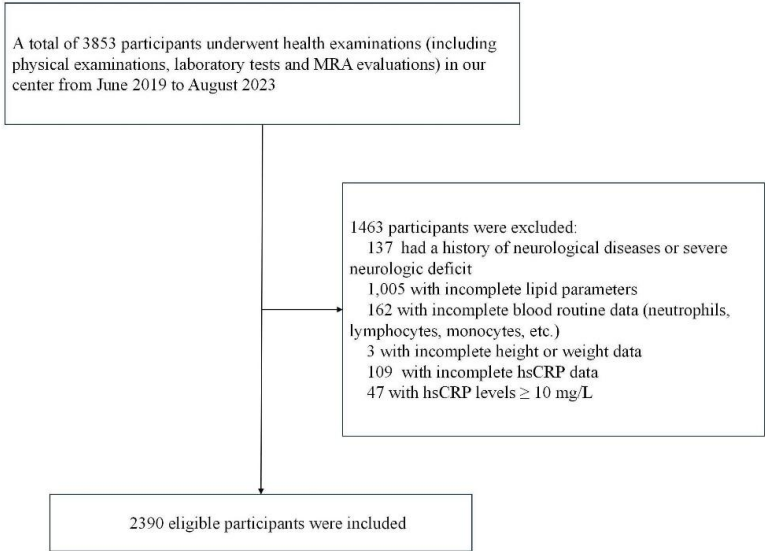

Figure S1. Study Population.

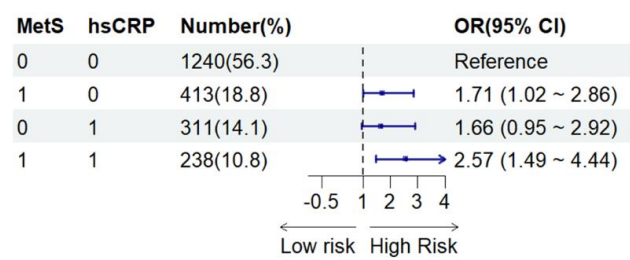

**Figure S2:** Joint effects of hsCRP and MetS on aICAS in the subgroup aged  $\leq 65$  years. The groups are defined as follows: 00- no metabolic syndrome, hsCRP in quartiles 1-3; 10-metabolic syndrome present, hsCRP in quartiles 1-3; 01- no metabolic syndrome, hsCRP in quartile 4; 11- metabolic syndrome present, hsCRP in quartile 4. Adjusted for sex and coronary heart disease. OR, odds ratio; CI, confidence interval; MetS, metabolic syndrome; aICAS, asymptomatic intracranial arterial stenosis; hsCRP, high-sensitivity C-reactive protein.

Table S1: Baseline characteristics of the participants aged over or not greater than 65 years old

| Characteristics               | Total<br>(n = 2390)     | Participants aged<br>≤ 65s<br>(n = 2202) | Participants aged<br>> 65s<br>(n = 188) | P      |
|-------------------------------|-------------------------|------------------------------------------|-----------------------------------------|--------|
| Age, year                     | 52.00 (44.00, 58.00)    | 51.00 (43.00, 56.00)                     | 69.00 (67.00, 72.00)                    | <0.001 |
| Male, n (%)                   | 1469 (61.46)            | 1371 (62.26)                             | 98 (52.13)                              | 0.006  |
| BMI, kg/m <sup>2</sup>        | 25.40 (23.19, 27.76)    | 25.39 (23.18, 27.75)                     | 25.57 (23.55, 27.87)                    | 0.533  |
| Hypertension, n (%)           | 623 (26.07)             | 543 (24.66)                              | 80 (42.55)                              | <0.001 |
| Diabetes mellitus, n (%)      | 223 (9.33)              | 193 (8.76)                               | 30 (15.96)                              | 0.001  |
| Coronary heart disease, n (%) | 69 (2.89)               | 56 (2.54)                                | 13 (6.91)                               | <0.001 |
| Dyslipidemia, n (%)           | 217 (9.08)              | 194 (8.81)                               | 23 (12.23)                              | 0.117  |
| Smoking, n (%)                | 714 (29.87)             | 660 (29.97)                              | 54 (28.72)                              | 0.719  |
| TC, mmol/l                    | 4.89 (4.30, 5.49)       | 4.88 (4.29, 5.49)                        | 4.94 (4.33, 5.52)                       | 0.652  |
| LDL-C, mmol/l                 | 3.05 (2.46, 3.60)       | 3.04 (2.46, 3.59)                        | 3.09 (2.50, 3.64)                       | 0.497  |
| ApoA1, g/l                    | 1.41 (1.26, 1.57)       | 1.41 (1.26, 1.57)                        | 1.43 (1.29, 1.58)                       | 0.272  |
| ApoB, g/l                     | 0.93 (0.80, 1.09)       | 0.93 (0.80, 1.09)                        | 0.94 (0.81, 1.09)                       | 0.517  |
| Hcy, umol/l                   | 12.21 (10.21, 14.94)    | 12.09 (10.16, 14.80)                     | 13.18 (10.95, 16.56)                    | <0.001 |
| hsCRP, mg/l                   | 0.72 (0.34, 1.50)       | 0.69 (0.33, 1.45)                        | 1.10 (0.54, 2.09)                       | <0.001 |
| NLR                           | 1.94 (1.54, 2.46)       | 1.93 (1.53, 2.45)                        | 2.03 (1.63, 2.66)                       | 0.052  |
| MHR                           | 0.24 (0.17, 0.31)       | 0.24 (0.17, 0.31)                        | 0.24 (0.18, 0.31)                       | 0.839  |
| UA, umol/l                    | 341.05 (277.40, 404.48) | 341.75 (277.10, 404.65)                  | 322.20 (278.70, 397.85)                 | 0.292  |
| aICAS, n (%)                  | 135 (5.65)              | 109 (4.95)                               | 26 (13.83)                              | <0.001 |
| MetS- related characteristics |                         |                                          |                                         |        |
| Waistline, cm                 | 88.00 (80.00, 94.00)    | 87.00 (80.00, 94.00)                     | 90.00 (83.00, 94.25)                    | 0.016  |
| SBP, mmHg                     | 127.00 (116.00, 138.00) | 126.00 (116.00, 136.00)                  | 141.00 (128.00, 153.00)                 | <0.001 |
| DBP, mmHg                     | 81.00 (73.00, 89.00)    | 81.00 (73.00, 89.00)                     | 82.00 (73.75, 88.00)                    | 0.979  |
| HDL-C, mmol/l                 | 1.33 (1.15, 1.55)       | 1.33 (1.14, 1.56)                        | 1.35 (1.17, 1.54)                       | 0.561  |
| TG, mmol/l                    | 1.33 (0.92, 1.98)       | 1.34 (0.92, 2.00)                        | 1.27 (0.87, 1.86)                       | 0.095  |

Table S1: Baseline characteristics of the participants aged over or not greater than 65 years old

| Characteristics                           | Total<br>(n = 2390) | Participants aged<br>≤ 65s<br>(n = 2202) | Participants aged<br>> 65s<br>(n = 188) | P      |
|-------------------------------------------|---------------------|------------------------------------------|-----------------------------------------|--------|
| FBG, mmol/l                               | 4.94 (4.61, 5.45)   | 4.92 (4.60, 5.40)                        | 5.16 (4.82, 5.86)                       | <0.001 |
| Metsss                                    | 1.22 (0.09, 2.82)   | 1.12 (0.00, 2.78)                        | 1.86 (0.88, 2.95)                       | <0.001 |
| Metabolic Syndrome<br>(No. of Components) |                     |                                          |                                         | <0.001 |
| 0                                         | 501 (20.96)         | 492 (22.34)                              | 9 (4.79)                                |        |
| 1                                         | 551 (23.05)         | 509 (23.12)                              | 42 (22.34)                              |        |
| 2                                         | 612 (25.61)         | 550 (24.98)                              | 62 (32.98)                              |        |
| 3                                         | 459 (19.21)         | 408 (18.53)                              | 51 (27.13)                              |        |
| 4                                         | 225 (9.41)          | 206 (9.36)                               | 19 (10.11)                              |        |
| 5                                         | 42 (1.76)           | 37 (1.68)                                | 5 (2.66)                                |        |

BMI, body mass index; SBP, systolic blood pressure; DBP, diastolic blood pressure; FBG, fasting blood glucose; HDL- C, high-density lipoprotein cholesterol; LDL- C, low- density lipoprotein cholesterol; TC, total cholesterol; TG, triglycerides; ApoA1, apolipoprotein A1; ApoB, apolipoprotein B; Hcy, homocysteine; hsCRP, high-sensitivity C-reactive protein; NLR, neutrophil-lymphocyte ratio; MHR, monocyte-to-high-density lipoprotein-cholesterol ratio; UA, uric acid; MetS, metabolic syndrome; Metsss, metabolic syndrome severity score; aICAS, Asymptomatic Intracranial Arterial Stenosis.

Table S2: Univariate Logistic Regression Analysis for association with aICAS in the subset aged  $\leq 65$  years

| Variables               | OR (95%CI)         | P      |
|-------------------------|--------------------|--------|
| Male                    | 0.92 (0.61 ~ 1.37) | 0.665  |
| Hypertension            | 2.64 (1.79 ~ 3.91) | <0.001 |
| Diabetes mellitus       | 2.67 (1.62 ~ 4.40) | <0.001 |
| Coronary heart disease  | 3.37 (1.56 ~ 7.32) | 0.002  |
| Dyslipidaemia           | 1.57 (0.88 ~ 2.80) | 0.130  |
| Smoking,                | 1.02 (0.67 ~ 1.54) | 0.944  |
| BMI, kg/m <sup>2</sup>  |                    |        |
| < 24.00                 | 1.00 (Reference)   |        |
| 24.00 -27.99            | 1.34 (0.84 ~ 2.14) | 0.216  |
| $\geq 28.00$            | 1.53 (0.90 ~ 2.59) | 0.115  |
| Hcy, per SD increase    | 1.01 (0.82 ~ 1.20) | 0.887  |
| Quartiles of hsCRP      |                    |        |
| Q1 (< 0.33)             | 1.00 (Reference)   |        |
| Q2 (0.33-0.69)          | 1.07 (0.60 ~ 1.90) | 0.815  |
| Q3 (0.69-1.45)          | 0.97 (0.54 ~ 1.76) | 0.928  |
| Q4 ( $\geq 1.45$ )      | 1.78 (1.05 ~ 3.01) | 0.032  |
| MHR, per SD increase    | 1.11 (0.92 ~ 1.32) | 0.264  |
| NLR, per SD increase    | 1.09 (0.90 ~ 1.29) | 0.334  |
| LDL-C, per SD increase  | 1.05 (0.86 ~ 1.26) | 0.644  |
| TC, per SD increase     | 1.02 (0.84 ~ 1.23) | 0.880  |
| ApoA1, per SD increase  | 0.93 (0.76 ~ 1.13) | 0.476  |
| ApoB, per SD increase   | 1.07 (0.88 ~ 1.29) | 0.501  |
| Metabolic Syndrome      | 1.80 (1.21 ~ 2.66) | 0.003  |
| No. of MetS Component   |                    |        |
| $\leq 1$                | 1.00 (Reference)   |        |
| 2                       | 1.48 (0.89 ~ 2.46) | 0.130  |
| 3                       | 2.03 (1.22 ~ 3.39) | 0.006  |
| $\geq 4$                | 2.21 (1.23 ~ 3.97) | 0.008  |
| Metsss, per SD increase | 1.34 (1.13 ~ 1.59) | 0.001  |

OR, odds ratio; CI, confidence interval; SD, standard deviation; BMI, body mass index; Hcy, homocysteine; hsCRP, high-sensitivity C-reactive protein; MHR, monocyte-to-high-density lipoprotein-cholesterol ratio; NLR, neutrophil-lymphocyte ratio; LDL-C, low-density lipoprotein cholesterol; TC, total cholesterol; ApoA1, apolipoprotein A1; ApoB, apolipoprotein B; MetS, metabolic syndrome; Metsss, metabolic syndrome severity score; aICAS, asymptomatic intracranial arterial stenosis.

| Table S3. Multivariate Logistic Regression Analysis for association with circulatory patterns of aICAS |           |                     |        |                     |        |                     |        |  |
|--------------------------------------------------------------------------------------------------------|-----------|---------------------|--------|---------------------|--------|---------------------|--------|--|
| Circulation,<br>n (%)                                                                                  | Variables | Model1 *            |        | Model2 †            |        | Model3 ‡            |        |  |
|                                                                                                        |           | OR<br>(95%CI)       | P      | OR<br>(95%CI)       | P      | OR<br>(95%CI)       | P      |  |
| no aICAS                                                                                               |           | 1.00<br>(Reference) |        | 1.00<br>(Reference) |        | 1.00<br>(Reference) |        |  |
| posterior                                                                                              | MetS      | 3.71 (2.04 ~ 6.76)  | <0.001 | 3.02 (1.65 ~ 5.55)  | <0.001 | 2.84 (1.54 ~ 5.23)  | 0.001  |  |
|                                                                                                        | Metsss    | 3.41 (1.90 ~ 6.12)  | <0.001 | 3.13 (1.73 ~ 5.66)  | <0.001 | 2.93 (1.61 ~ 5.33)  | <0.001 |  |
| anterior                                                                                               | MetS      | 1.43(0.90 ~ 2.27)   | 0.128  | 1.32(0.82 ~ 2.11)   | 0.254  | 1.26 (0.79 ~ 2.03)  | 0.336  |  |
|                                                                                                        | Metsss    | 1.34(0.82 ~ 2.18)   | 0.242  | 1.31 (0.80 ~ 2.15)  | 0.283  | 1.25 (0.76 ~ 2.06)  | 0.376  |  |
| both                                                                                                   | MetS      | 0.68 (0.14 ~ 3.29)  | 0.633  | 0.64 (0.13 ~ 3.16)  | 0.581  | 0.65 (0.13 ~ 3.23)  | 0.594  |  |
|                                                                                                        | Metsss    | 0.89 (0.19 ~ 4.31)  | 0.887  | 0.91 (0.19 ~ 4.43)  | 0.904  | 0.92 (0.19 ~ 4.57)  | 0.923  |  |

OR, odds ratio; CI, confidence interval; MetS, metabolic syndrome; Metsss, metabolic syndrome severity score; aICAS, asymptomatic intracranial arterial stenosis; hsCRP, high-sensitivity C-reactive protein.

MetS: Using no MetS as the reference group; Metsss: Represents the fourth quartile of Metsss, using the first to third quartiles as the reference group.

\* Model1: Unadjusted; † Model2: Adjusted for age, gender, coronary heart disease; ‡ Model3: Adjusted for Model2+ hsCRP.

| Table S4: Interactive effects of hsCRP and MetS on risk of aICAS |              |            |
|------------------------------------------------------------------|--------------|------------|
| Interactive items                                                | Effect value | 95%CI      |
| Additive scale                                                   |              |            |
| RERI                                                             | -0.05        | -1.64~1.48 |
| AP                                                               | -0.02        | -0.92~0.39 |
| S index                                                          | 0.97         | 0.34~2.72  |
| Multiplicative scale                                             | 0.82         | 0.39~1.75  |

RERI, relative excess risk due to interaction; AP, attributable proportion due to interaction; S index, synergy index; CI, confidence interval; OR, odds ratio; MetS, metabolic syndrome; aICAS, asymptomatic intracranial arterial stenosis; hsCRP, high-sensitivity C-reactive protein; MHR, monocyte-to-high-density lipoprotein-cholesterol ratio; NLR, neutrophil-lymphocyte ratio; Adjusted for age, sex, coronary heart disease, MHR, NLR.

| Table S5: Interactive effects of hsCRP and MetS on risk of aICAS in the subgroup aged ≤ 65 years |              |            |
|--------------------------------------------------------------------------------------------------|--------------|------------|
| Interactive items                                                                                | Effect value | 95%CI      |
| Additive scale                                                                                   |              |            |
| RERI                                                                                             | 0.20         | -1.62~1.96 |
| AP                                                                                               | 0.08         | -0.82~0.48 |
| S index                                                                                          | 1.14         | 0.38~3.41  |
| Multiplicative scale                                                                             | 0.90         | 0.39~2.07  |

RERI, relative excess risk due to interaction; AP, attributable proportion due to interaction; S index, synergy index; CI, confidence interval; MetS, metabolic syndrome; hsCRP, high-sensitivity C-reactive protein. Adjusted for sex and coronary heart disease.



| Table S6. Comparison of three preceding studies on the association between MetS and aICAS with our study |                            |                 |                 |                             |
|----------------------------------------------------------------------------------------------------------|----------------------------|-----------------|-----------------|-----------------------------|
| Characteristics                                                                                          | Kongcun Town study         | APAC study      | Shunyi study    | Present study               |
| Sample size                                                                                              | 1988                       | 5393            | 943             | 2390                        |
| Population                                                                                               | population-based           | community-based | community-based | healthy check-up population |
| Age, year                                                                                                | 57.6 (10.3)                | 55.2 (11.8)     | 55.6 (9.2)      | 52.0 (44.0, 58.0)           |
| Male, n (%)                                                                                              | 956 (48.0)                 | 3230 (59.9)     | 340 (36.1)      | 1469 (61.5)                 |
| BMI, kg/m²                                                                                               | 25.1 (3.3)                 | 24.9 (3.3)      | 26.5 (3.7)      | 25.4 (23.2, 27.8)           |
| MetS, n (%)                                                                                              | 909 (45.7)                 | 1323 (24.5)     | 496 (52.6)      | 726 (30.4)                  |
| aICAS, n (%)                                                                                             | 132 (6.6)                  | 713 (13.2)      | 123 (13.0)      | 135 (5.7)                   |
| aICAS detection method                                                                                   | MRA when TCD were positive | TCD             | MRA             | MRA                         |

MetS, metabolic syndrome; aICAS, asymptomatic Intracranial Arterial Stenosis; BMI, body mass index; APAC, the Asymptomatic Polyvascular Abnormalities Community study.
